# Supplementary material
Source: PubMed Central journal article supplement (PMC1450222)
Supplement: pnas_0511304103_1.pdf [file pnas_0511304103_1.pdf]

**Table 2. Demographic and treatment safety data for the phase 1 trial of high-dose oral *N*-acetylcysteine in cystic fibrosis**

|                      | Subject information    |                   |                     |                                |                       |                     |                    |                | Adverse effects     |                                                                     |                 |                        |
|----------------------|------------------------|-------------------|---------------------|--------------------------------|-----------------------|---------------------|--------------------|----------------|---------------------|---------------------------------------------------------------------|-----------------|------------------------|
|                      | Trial ID               | Age (yrs)         | Gender              | Genotype group                 | Pancr. Insuff.        | P aer. infection    | FEV1 % pred        | Compliance (%) | Clinical monitoring | Patient reporting                                                   | Duration (days) | Probable cause(s)      |
| COHORT #1<br>1.8 g/d | 001                    | 11                | F                   | CH<br>HO                       | PI                    | N                   | 110                | 88             | None                | Headache                                                            | 1               | Dehydration            |
|                      | 002                    | 11                | F                   |                                | PI                    | Y                   | 50                 | 93             | None                | Increased cough, sputum; decreased peak flow and exercise tolerance | 9               | Infection              |
|                      | 003                    | 40                | F                   | CH                             | PI                    | N                   | 67                 | 96             | None                | Heartburn                                                           | 8               | Drug                   |
|                      | 004                    | 18                | F                   | CH                             | PI                    | Y                   | 82                 | 93             | None                | Heartburn                                                           | 5               | Drug                   |
|                      | 005                    | 16                | F                   | HO                             | PI                    | N                   | 108                | 76             | None                | Nausea                                                              | 3               | Drug                   |
|                      | 006                    | 32                | F                   | HO                             | PI                    | Y                   | 47                 | 96             | None                | Heartburn                                                           | 19              | Drug                   |
|                      | <b>6/6 completed</b>   | 21 (11-40)        | 6 F                 | 3 CH<br>3 HO                   | 6 PI                  | 3 Y<br>3 N          | 77 (47-110)        | 90             | 0/6                 | <b>Drug caused: heartburn, nausea</b>                               | 9               | <b>4/6 (all mild)</b>  |
| COHORT #2<br>2.4 g/d | 007                    | 14                | F                   | CH                             | PI                    | Y                   | 59                 | 87             | None                | None                                                                | N/A             | N/A                    |
|                      | 008                    | 14                | F                   | HO                             | PI                    | Y                   | 53                 | 94             | None                | Sore throat                                                         | 1               | Infection              |
|                      | 009                    | 12                | M                   | CH                             | PI                    | Y                   | 88                 | 96             | None                | Headache, mild cough                                                | 28              | Ibuprofen withdrawal   |
|                      | 010                    | 28                | F                   | HO                             | PI                    | Y                   | 69                 | 100            | None                | Bad taste                                                           | 28              | Drug                   |
|                      | 011                    | 19                | F                   | OT                             | PI                    | Y                   | 44                 | 93             | None                | Rash                                                                | 3               | Contact dermatitis     |
|                      | 012                    | 44                | F                   | HO                             | PS                    | Y                   | 65                 | 92             | None                | Increased cough, heartburn                                          | 6,1             | N/A                    |
|                      | <b>6/6 completed</b>   | 22 (12-44)        | 5 F<br>1 M          | 2 CH<br>3 HO<br>1 OT           | 5 PI<br>1 PS          | 6 Y                 | 63 (44-88)         | 94             | 0/6                 | <b>Drug caused: bad taste</b>                                       | 28              | <b>1/6 (mild)</b>      |
| COHORT #3<br>3.0 g/d | 013                    | 27                | M                   | CH                             | PI                    | Y                   | 89                 | 94             | None                | Heartburn                                                           | 10              | Drug                   |
|                      | 014                    | 35                | F                   | CH                             | PS                    | Y                   | 93                 | 94             | None                | Cold symptoms                                                       | 1               | Infection              |
|                      | 015                    | 38                | M                   | CH                             | PI                    | Y                   | 58                 | 95             | None                | Constipation                                                        | 2               | Intestinal obstruction |
|                      | 016                    | 23                | M                   | HO                             | PI                    | N                   | 89                 | 93             | None                | Increased cough, chest pain                                         | 10              | Lung disease           |
|                      | 017                    | 31                | M                   | CH                             | PI                    | Y                   | 49                 | 100            | None                | Weight loss, increased cough, flatulence                            | 28              | Lung disease; Drug     |
|                      | 018                    | 31                | M                   | CH                             | PS                    | Y                   | 55                 | 94             | None                | Increased sputum                                                    | 18              | N/A                    |
|                      | <b>6/6 completed</b>   | 31 (23-38)        | 1 F<br>5 M          | 5 CH<br>1 HO                   | 4 PI<br>2 PS          | 5 Y<br>1 N          | 72 (49-93)         | 95             | 0/6                 | <b>Drug caused: heartburn, flatulence</b>                           | 19              | <b>2/6 (all mild)</b>  |
| <b>TOTAL</b>         | <b>18/18 completed</b> | <b>25 (11-44)</b> | <b>12 F<br/>6 M</b> | <b>10 CH<br/>7 HO<br/>1 OT</b> | <b>15 PI<br/>3 PS</b> | <b>14 Y<br/>4 N</b> | <b>71 (44-110)</b> | <b>93</b>      | <b>0 / 18</b>       | <b>Drug caused: bad taste, heartburn, nausea, flatulence</b>        | <b>14</b>       | <b>7/18 (all mild)</b> |

CH, 1 ΔF508 and 1 other mutation; HO, ΔF508 / ΔF508; OT, other; P aer., *P. aeruginosa*, Pancr. Insuff, pancreatic insufficient.
